# Supplementary material
Source: Royal Society of Chemistry journal article supplement (doi:10.1039/d6ay00035e)
Supplement: d6ay00035e1.pdf [file d6ay00035e1.pdf]

Supporting information

## **Research on a Highly Sensitive Aptamer Sensor for *Vibrio alginolyticus* Based on CRISPR-Cas13a and T7 Transcription Cascade Amplification**

Yukun Zhao <sup>a,b</sup>, He Sun <sup>b</sup>, Yue Wan<sup>a</sup>, Zebin Zhang <sup>b</sup>, Lingyi Xiao<sup>a</sup>, Tingting Han<sup>a</sup>, Zhuo Hao<sup>b</sup>, Nan Li<sup>b</sup>, Chunying Pang <sup>c</sup>, Wenhui Zhang<sup>a\*</sup>, Jiayu Wan<sup>b\*</sup>

<sup>a</sup> College of Life Sciences, Jilin Agricultural University, Changchun, 130118, China

<sup>b</sup> Changchun Veterinary Research Institute, Chinese Academy of Agricultural Sciences, Changchun, 130122, China

<sup>c</sup> College of Geo-exploration Sciences and Technology, Jilin University, Changchun 130026, China

*\*Corresponding Author: Wenhui Zhang, Jiayu Wan*

*E-mail addresses:*

*wenhui.changchun@163.com (W. Zhang),*

*wanjiayu@hotmail.com (J. Wan)*

**Table 1.** Oligonucleotide sequences used in this study

---

| Name          | Sequence(5'-3')                                                                                      |
|---------------|------------------------------------------------------------------------------------------------------|
| RZ-1          | TCAGTCGCTTCGCCGTCTCCTTCAGCCGGGGTGGTCAGTAGGA<br>GCAGCACAAGAGGGAGACCCCAGAGGG                           |
| RZ-4          | TCAGTCGCTTCGCCGTCTCCTTCGTAGGAGGTAGTCGGAGAGGCCGAATGAGAGGGGAAGCACAAGAGGGA<br>GCACAAGAGGGAGACCCCAGAGGG  |
| RZ-8          | TTTCTTCTATTTCGCGATCTCATACAACCTACTTATCTCATTCTTTACC                                                    |
| RZ-9          | GACGCTTACTCAGGTGTGACTCG-TTTCTTCTATTTCGCGATCTCATACAACCTACTTATCTCATTCTTTACC-CGAAGGACGC<br>AGATGAAGTCTC |
| F1            | CTC CGC ACG ACT GCC ATC TA                                                                           |
| R1            | TCC CAC AAG GAC GCC ATA AA                                                                           |
| Apt-RZ9       | GACGCTTACTCAGGTGTGACTCGTTTCTTCTATTTCGCGATCTCATACAACCTACTTATCTCATTCTTTACCCGAAGGACGCAGATG<br>AAGTCTC   |
| Blocker-RZ9-1 | TATGAGATCGCGAATAGAAGTTTTTTTTTTTTTTTGTGCACACCTGAGTAAGCGTC                                             |
| Hp-RZ9-1      | GACGCTTACTCAGGTGTGACTAATACGACTCACTATAGCTTCTATTTCGCGATCTCATACCCTATAGTGAGTC<br>GTATTAGT                |
| Promoters     | TAATACGACTCACTATAGGG                                                                                 |
| Apt-RZ9       | GACGCTTACTCAGGTGTGACTCGTTTCTTCTATTTCGCGATCTCATACAACCTACTTATCTCATTCTTTACCCGAAGGACGCAGATG<br>AAGTCTC   |
| Blocker-RZ9-1 | TATGAGATCGCGAATAGAAGTTTTTTTTTTTTTTTGTGCACACCTGAGTAAGCGTC                                             |
| Hp-RZ9-1      | GACGCTTACTCAGGTGTGACTAATACGACTCACTATAGCTTCTATTTCGCGATCTCATACCCTATAGTGAGTC<br>GTATTAGT                |
| Promoters     | TAATACGACTCACTATAGGG                                                                                 |
| T7-序列         | GAAATTAATACGACTCACTATAGGG                                                                            |

---

---

|                                       |                                                                                                  |
|---------------------------------------|--------------------------------------------------------------------------------------------------|
| <b>Cas13a-<br/>crRNA (RZ9-<br/>1)</b> | <b>AGTCGTATTAGTCACACCTGAGTAAGCGTCGTTTTAGTCCCCTTCATTTTTGGGGTGGTCCCCTATAGTGAGTCGTATT<br/>AATTC</b> |
| <b>Target (RZ9-<br/>1)</b>            | <b>GACGCTTACTCAGGTGTGACTAATACGACTCCCTATAGTGAGTCGTATTAATTC</b>                                    |
| <b>Cas13a-<br/>crRNA (RZ9-<br/>2)</b> | <b>AGTCGTATTAGTCACACCTGAGTAAGCGTCGTTTTAGTCCCCTTCATTTTTGGGGTGGTCCCCTATAGTGAGTCGTATTAATTC</b>      |
| <b>Target (RZ9-<br/>2)</b>            | <b>CTTACTCAGGTGTGACTAATACGACTCACTCCCTATAGTGAGTCGTATTAATTC</b>                                    |
| <b>Cas13a-<br/>crRNA (RZ9-<br/>3)</b> | <b>GCGAATAGAAGCTATAGTGAGTCGTATTAGTTTTAGTCCCCTTCATTTTTGGGGTGGTCCCCTATAGTGAG<br/>TCGTATTAATTC</b>  |
| <b>Target (RZ9-<br/>3)</b>            | <b>CTAATACGACTCACTATAGCTTCTATTGCCCCCTATAGTGAGTCGTATTAATTC</b>                                    |

---

**Table 2. Original qPCR Ct Values and Quantitative Results**

| <b>Sample</b> | <b>Ct value (Rep 1)</b> | <b>Ct value (Rep 2)</b> | <b>Ct value (Rep 3)</b> |
|---------------|-------------------------|-------------------------|-------------------------|
| <b>1</b>      | <b>15.87</b>            | <b>16.87</b>            | <b>16.52</b>            |
| <b>2</b>      | <b>15.67</b>            | <b>16.89</b>            | <b>18.98</b>            |
| <b>3</b>      | <b>18.5</b>             | <b>19.7</b>             | <b>17.9</b>             |
| <b>4</b>      | <b>21.45</b>            | <b>21.34</b>            | <b>22.23</b>            |
| <b>5</b>      | <b>24.36</b>            | <b>23.23</b>            | <b>24.34</b>            |
| <b>6</b>      | <b>30.43</b>            | <b>32.1</b>             | <b>30.8</b>             |
| <b>7</b>      | <b>31.81</b>            | <b>30.2</b>             | <b>31.23</b>            |
| <b>8</b>      | <b>33.46</b>            | <b>32.3</b>             | <b>34.9</b>             |
| <b>9</b>      | <b>15.92</b>            | <b>16.45</b>            | <b>16.2</b>             |
| <b>10</b>     | <b>18.06</b>            | <b>18.78</b>            | <b>18.8</b>             |
| <b>11</b>     | <b>18.87</b>            | <b>18.11</b>            | <b>19.2</b>             |
| <b>12</b>     | <b>21.76</b>            | <b>21.3</b>             | <b>22.3</b>             |
| <b>13</b>     | <b>23.56</b>            | <b>24.3</b>             | <b>24.3</b>             |
| <b>14</b>     | <b>31.08</b>            | <b>31.11</b>            | <b>32.4</b>             |
| <b>15</b>     | <b>31.07</b>            | <b>31.22</b>            | <b>31.8</b>             |
| <b>16</b>     | <b>33.05</b>            | <b>32.4</b>             | <b>32.87</b>            |
| <b>17</b>     | <b>32.25</b>            | <b>31.2</b>             | <b>31.89</b>            |
| <b>18</b>     | <b>32.57</b>            | <b>32.44</b>            | <b>33.8</b>             |
| <b>19</b>     | <b>34.02</b>            | <b>35.8</b>             | <b>32.9</b>             |
| <b>20</b>     | <b>33.28</b>            | <b>37.8</b>             | <b>32.34</b>            |
